# Supplementary material for: The protective effect of l-theanine on the intestinal barrier in heat-stressed organisms
Source: Royal Society of Chemistry journal article supplement (doi:10.1039/d3fo04459a), 2024-01-01
Supplement: d3fo04459a1.pdf [file d3fo04459a1.pdf]

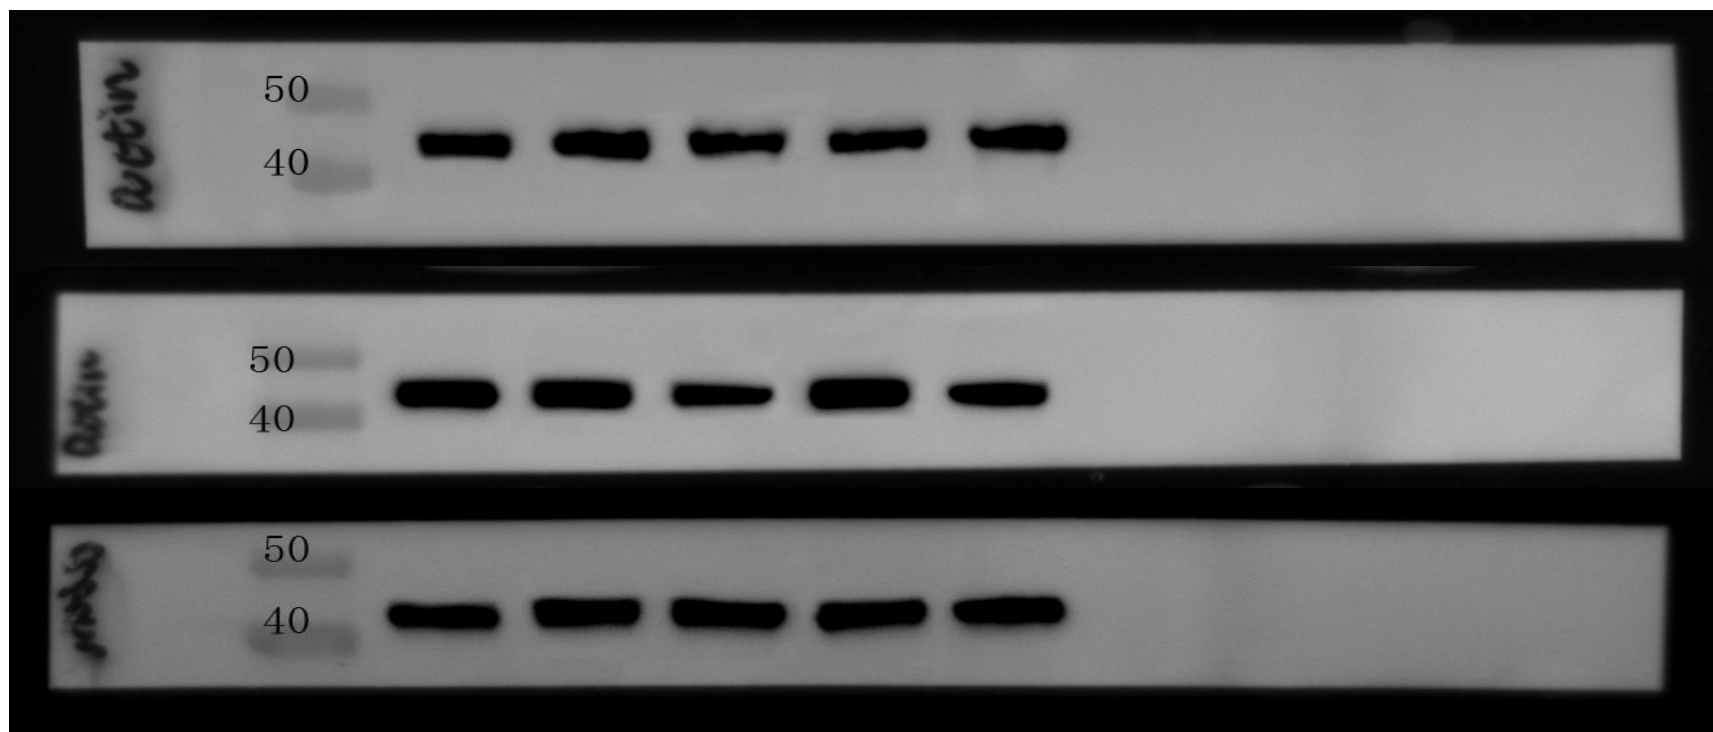

Fig.S1  $\beta$ -actin protein bands.

Table S1 Gray scale value of  $\beta$ -actin protein

| bands.         | CK     | CK     | CK     | MOD    | MOD    | MOD   | L1-HS | L1-HS  | L1-HS | L2-HS  | L2-HS  | L2-HS  | L4-HS | L4-HS  | L4-HS |
|----------------|--------|--------|--------|--------|--------|-------|-------|--------|-------|--------|--------|--------|-------|--------|-------|
| $\beta$ -actin | 123.92 | 116.96 | 112.22 | 122.44 | 120.89 | 88.21 | 89.43 | 123.94 | 98.60 | 133.13 | 120.53 | 102.20 | 96.87 | 120.39 | 90.12 |

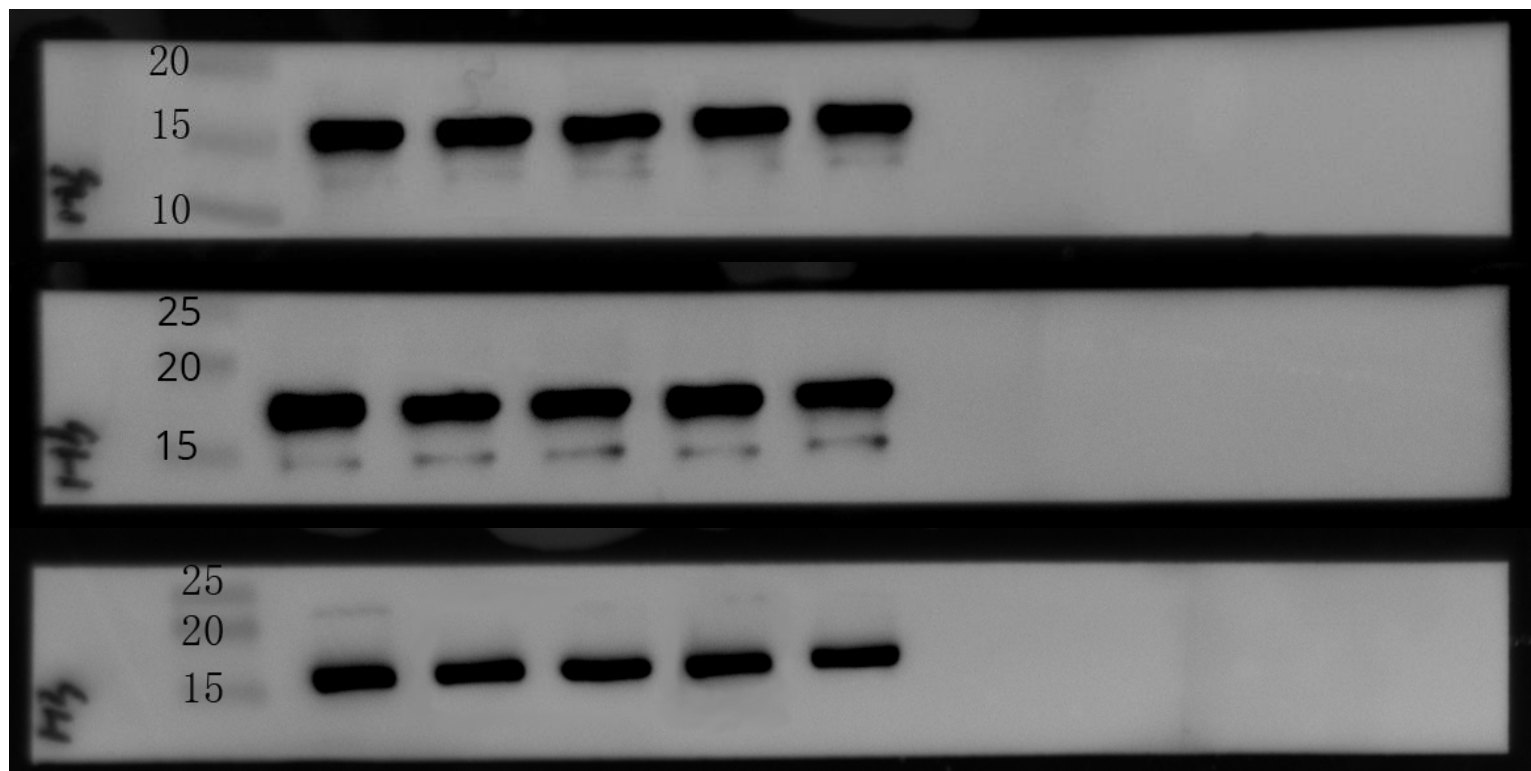

Fig.S2 H3 protein bands.

Table S2 Gray scale value of H3 protein

| bands. |        |        |        |        |       |        |        |        |       |        |        |        |        |       |       |
|--------|--------|--------|--------|--------|-------|--------|--------|--------|-------|--------|--------|--------|--------|-------|-------|
| Group  | CK     | CK     | CK     | MOD    | MOD   | MOD    | L1-HS  | L1-HS  | L1-HS | L2-HS  | L2-HS  | L2-HS  | L4-HS  | L4-HS | L4-HS |
| H3     | 121.67 | 108.98 | 111.19 | 114.52 | 91.04 | 100.97 | 107.90 | 101.59 | 95.42 | 115.56 | 105.55 | 100.52 | 117.60 | 95.24 | 92.60 |

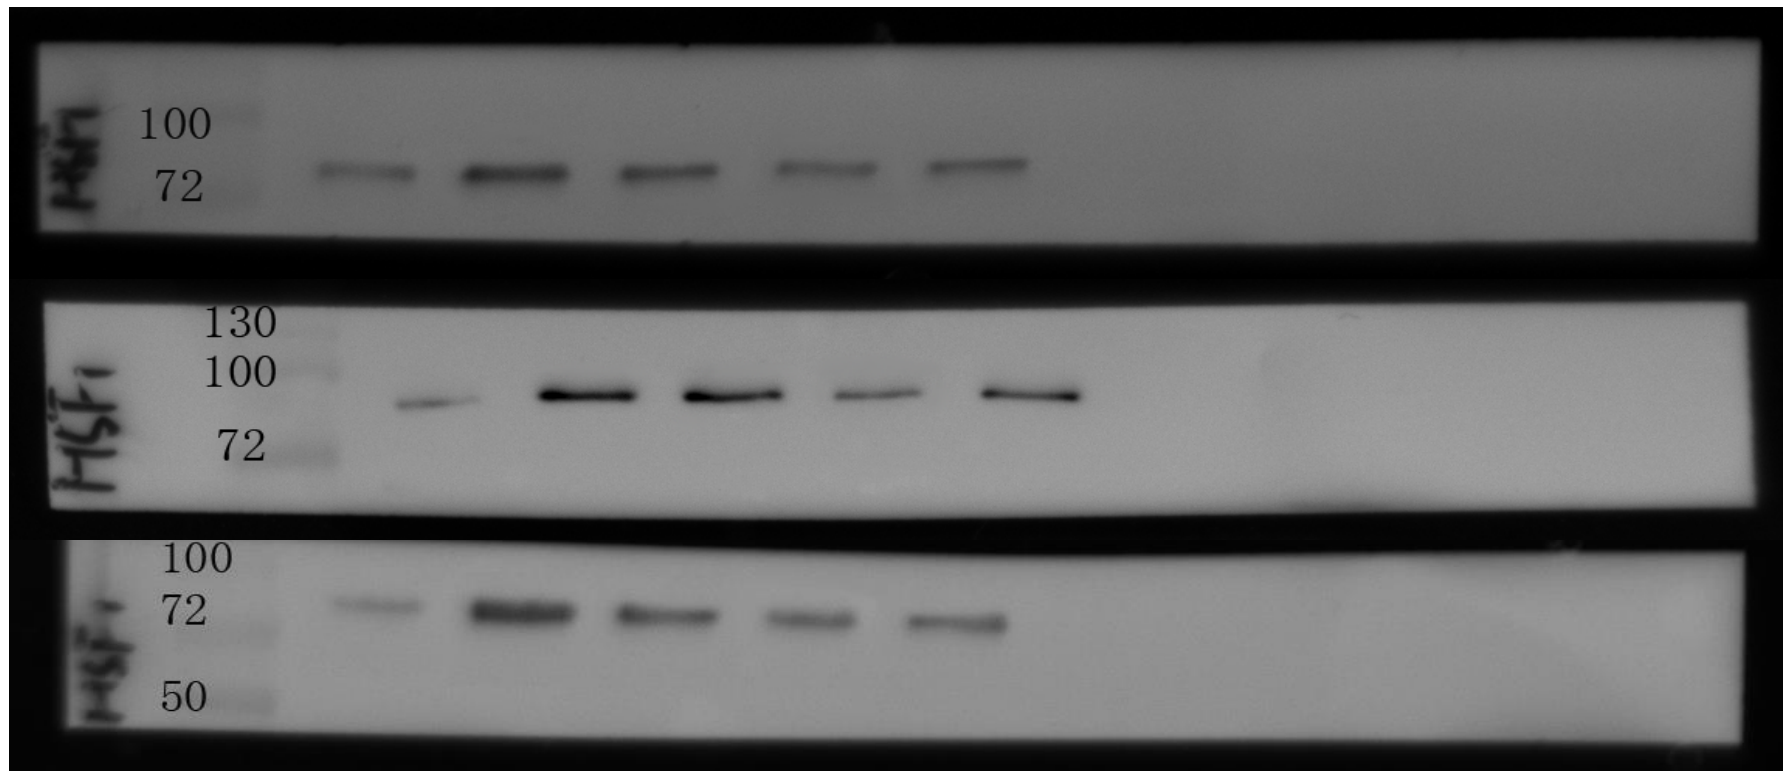

Fig.S3 Hsf1 protein bands.

Table S3 Gray scale value of Hsf1 protein

| bands.<br>Group | CK   | CK   | CK    | MOD   | MOD   | MOD   | L1-HS | L1-HS | L1-HS | L2-HS | L2-HS | L2-HS | L4-HS | L4-HS | L4-HS |
|-----------------|------|------|-------|-------|-------|-------|-------|-------|-------|-------|-------|-------|-------|-------|-------|
| Hsf1            | 9.98 | 9.34 | 10.07 | 35.28 | 26.93 | 30.48 | 23.68 | 17.07 | 21.98 | 10.55 | 12.82 | 10.06 | 17.31 | 13.59 | 15.04 |
| Hsf1/H3         | 0.08 | 0.09 | 0.09  | 0.31  | 0.30  | 0.30  | 0.22  | 0.17  | 0.23  | 0.09  | 0.12  | 0.10  | 0.15  | 0.14  | 0.16  |

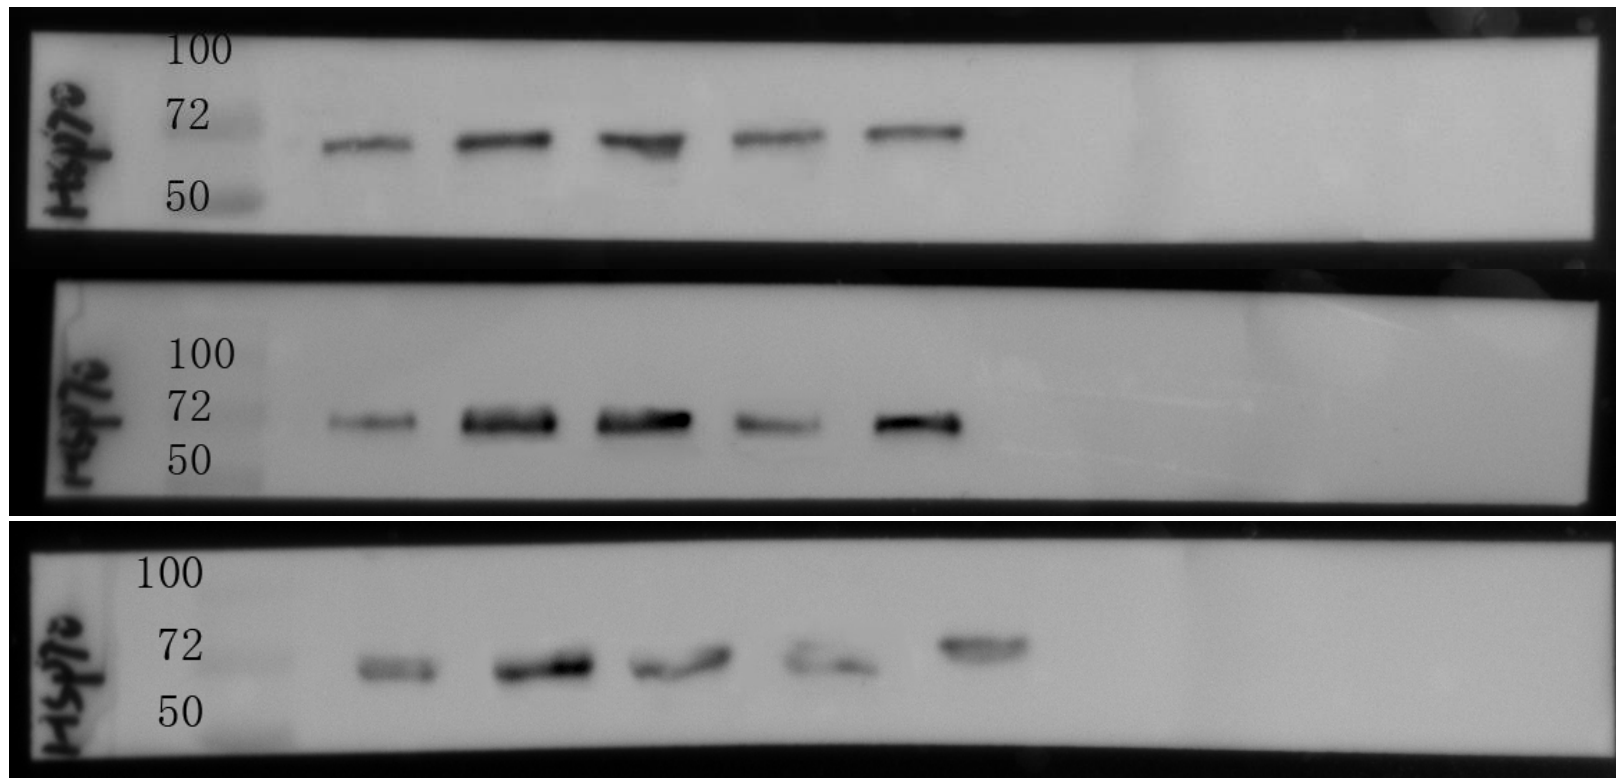

Fig.S4 Hsp70 protein bands.

Table S4 Gray scale value of Hsp70 protein

| bands.<br>Group           | CK   | CK    | CK   | MOD   | MOD   | MOD   | L1-HS | L1-HS | L1-HS | L2-HS | L2-HS | L2-HS | L4-HS | L4-HS | L4-HS |
|---------------------------|------|-------|------|-------|-------|-------|-------|-------|-------|-------|-------|-------|-------|-------|-------|
| Hsp70                     | 8.03 | 10.40 | 9.87 | 27.68 | 37.37 | 32.81 | 17.96 | 26.83 | 23.28 | 9.63  | 11.40 | 6.99  | 13.80 | 19.47 | 16.10 |
| Hsp70/ $\beta$ -<br>actin | 0.09 | 0.08  | 0.08 | 0.25  | 0.31  | 0.27  | 0.20  | 0.30  | 0.19  | 0.08  | 0.09  | 0.08  | 0.14  | 0.20  | 0.13  |

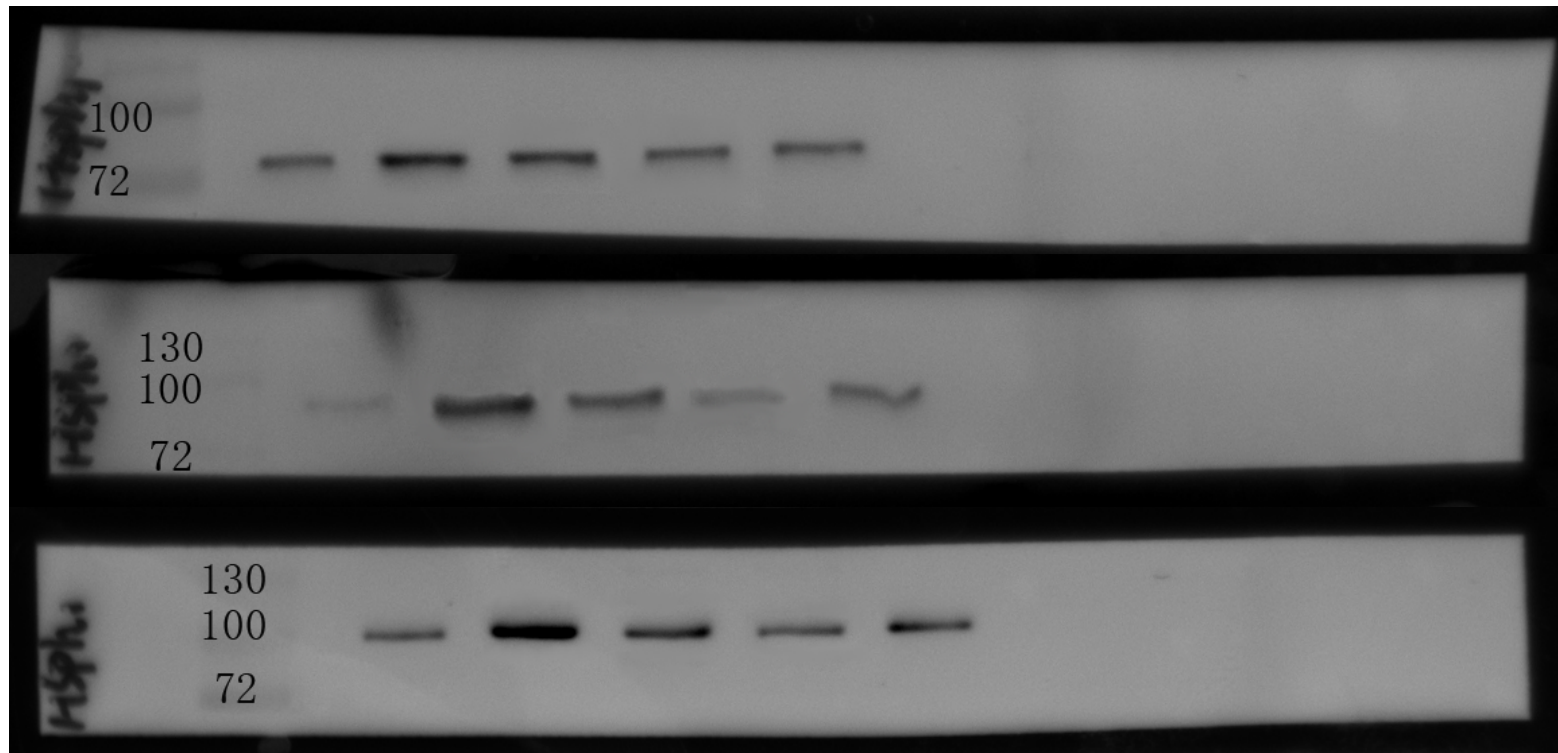

Fig.S5 Hsph1 protein bands.

Table S5 Gray scale value of Hsph1 protein

| bands.<br>Group           | CK    | CK   | CK   | MOD   | MOD   | MOD   | L1-HS | L1-HS | L1-HS | L2-HS | L2-HS | L2-HS | L4-HS | L4-HS | L4-HS |
|---------------------------|-------|------|------|-------|-------|-------|-------|-------|-------|-------|-------|-------|-------|-------|-------|
| Hsph1                     | 11.54 | 9.71 | 6.05 | 46.49 | 43.92 | 32.26 | 20.75 | 26.19 | 19.93 | 11.49 | 11.94 | 5.31  | 17.40 | 18.52 | 11.32 |
| Hsph1/ $\beta$ -<br>actin | 0.09  | 0.08 | 0.05 | 0.38  | 0.36  | 0.37  | 0.23  | 0.21  | 0.20  | 0.09  | 0.10  | 0.05  | 0.18  | 0.15  | 0.13  |

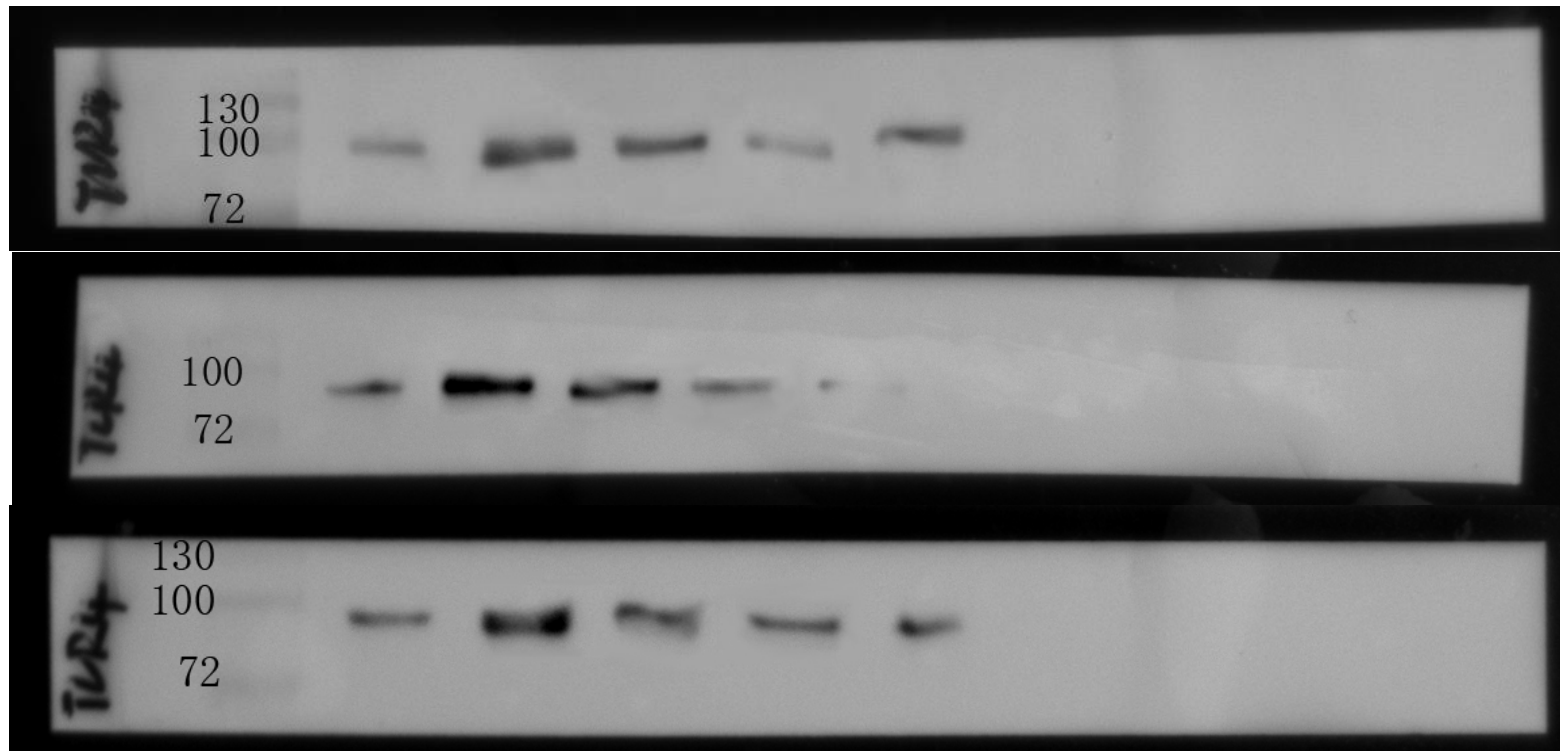

Fig.S6 TLR4 protein bands.

Table S6 Gray scale value of TLR4 protein

| bands Group          | CK    | CK   | CK    | MOD   | MOD   | MOD   | L1-HS | L1-HS | L1-HS | L2-HS | L2-HS | L2-HS | L4-HS | L4-HS | L4-HS |
|----------------------|-------|------|-------|-------|-------|-------|-------|-------|-------|-------|-------|-------|-------|-------|-------|
| TLR4                 | 13.14 | 7.96 | 10.22 | 39.97 | 33.25 | 32.29 | 24.30 | 22.98 | 19.10 | 12.97 | 8.42  | 10.73 | 8.19  | 16.07 | 14.14 |
| TLR4/ $\beta$ -actin | 0.11  | 0.07 | 0.11  | 0.33  | 0.28  | 0.29  | 0.27  | 0.19  | 0.21  | 0.10  | 0.07  | 0.12  | 0.08  | 0.13  | 0.14  |

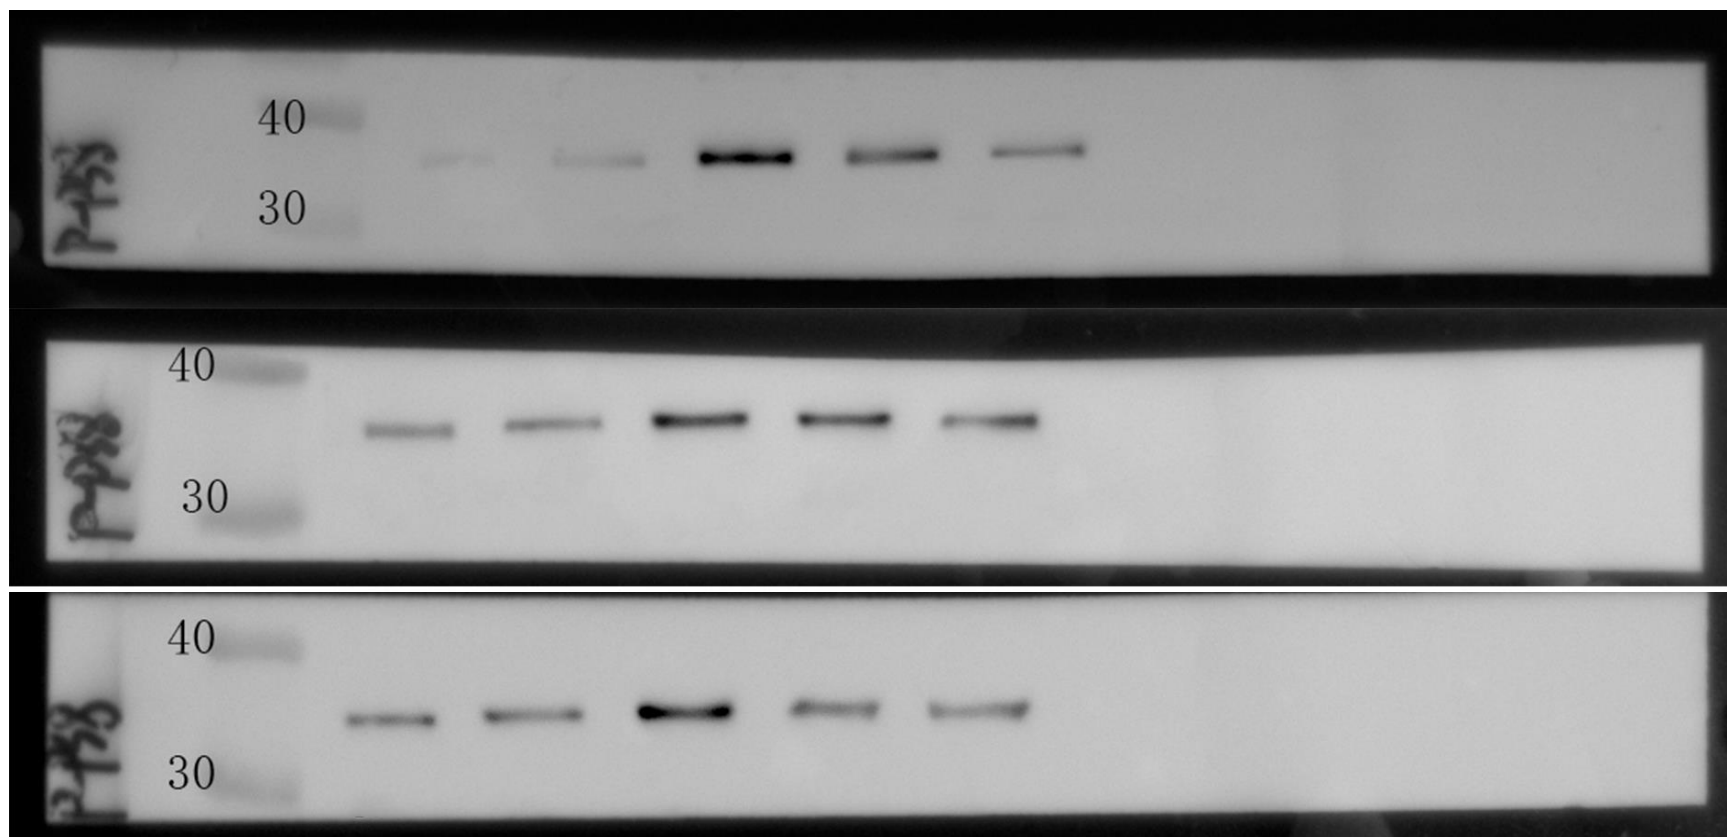

Fig.S7 p-P38 protein bands.

Table S7 Gray scale value of p-P38 protein

| bands Group | CK    | CK    | CK    | MOD  | MOD   | MOD   | L1-HS | L1-HS | L1-HS | L2-HS | L2-HS | L2-HS | L4-HS | L4-HS | L4-HS |
|-------------|-------|-------|-------|------|-------|-------|-------|-------|-------|-------|-------|-------|-------|-------|-------|
| p-P38       | 10.30 | 12.18 | 12.16 | 7.99 | 12.00 | 10.56 | 28.67 | 32.31 | 28.57 | 21.15 | 19.50 | 17.32 | 14.25 | 15.91 | 15.07 |

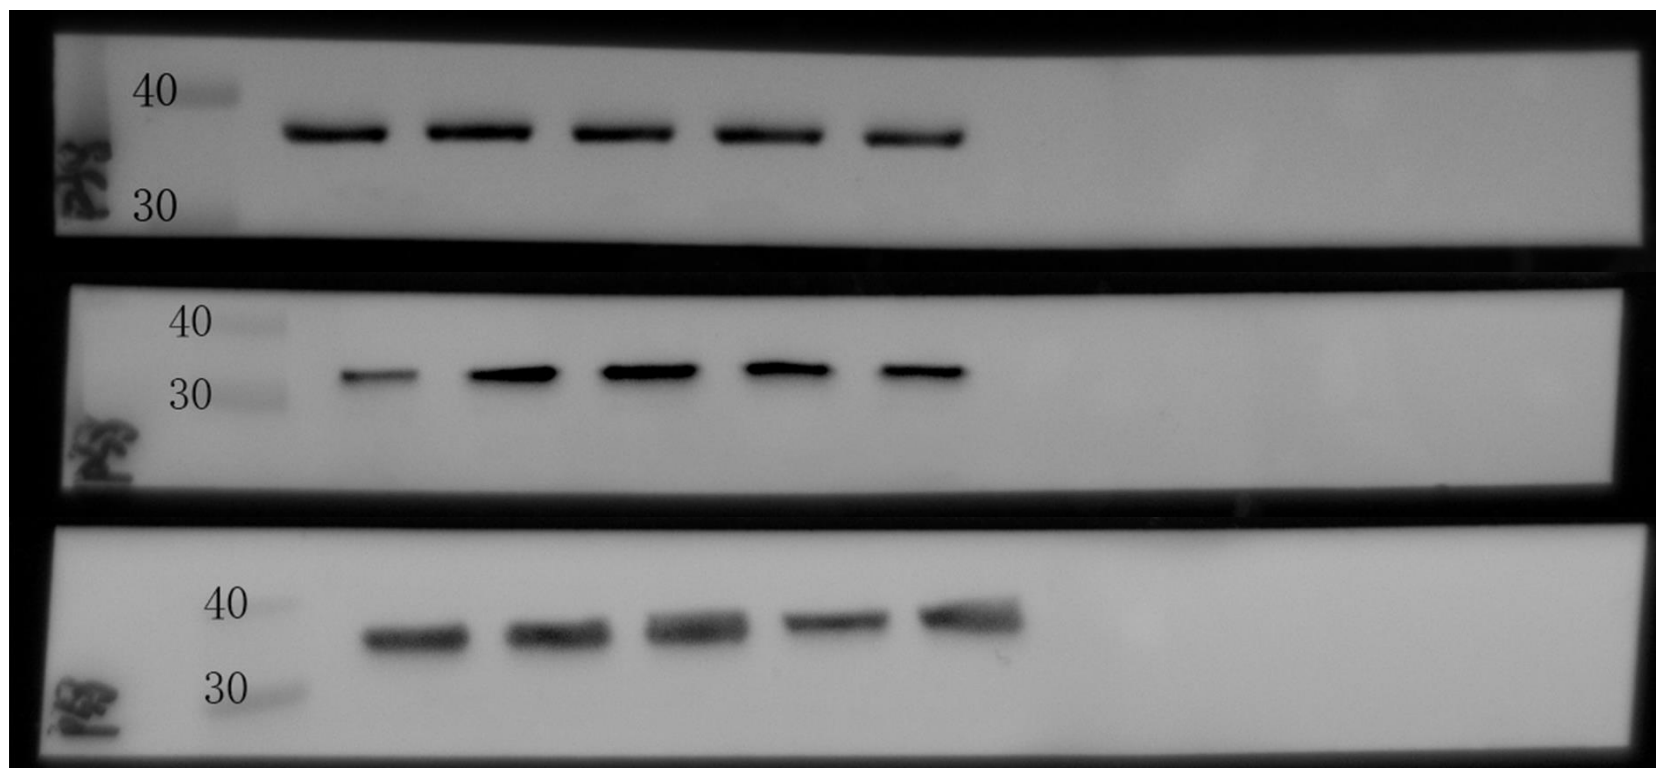

Fig.S8 P38 protein bands.

Table S8 Gray scale value of P38 protein

| bands Group | CK    | CK    | CK    | MOD   | MOD   | MOD   | L1-HS | L1-HS | L1-HS | L2-HS | L2-HS | L2-HS | L4-HS | L4-HS | L4-HS |
|-------------|-------|-------|-------|-------|-------|-------|-------|-------|-------|-------|-------|-------|-------|-------|-------|
| P38         | 40.48 | 30.69 | 37.32 | 48.08 | 57.24 | 44.91 | 50.75 | 55.92 | 39.65 | 39.28 | 40.68 | 38.04 | 49.32 | 40.62 | 33.52 |
| P-P38/P38   | 0.25  | 0.40  | 0.33  | 0.17  | 0.21  | 0.24  | 0.56  | 0.58  | 0.72  | 0.54  | 0.48  | 0.46  | 0.29  | 0.39  | 0.45  |



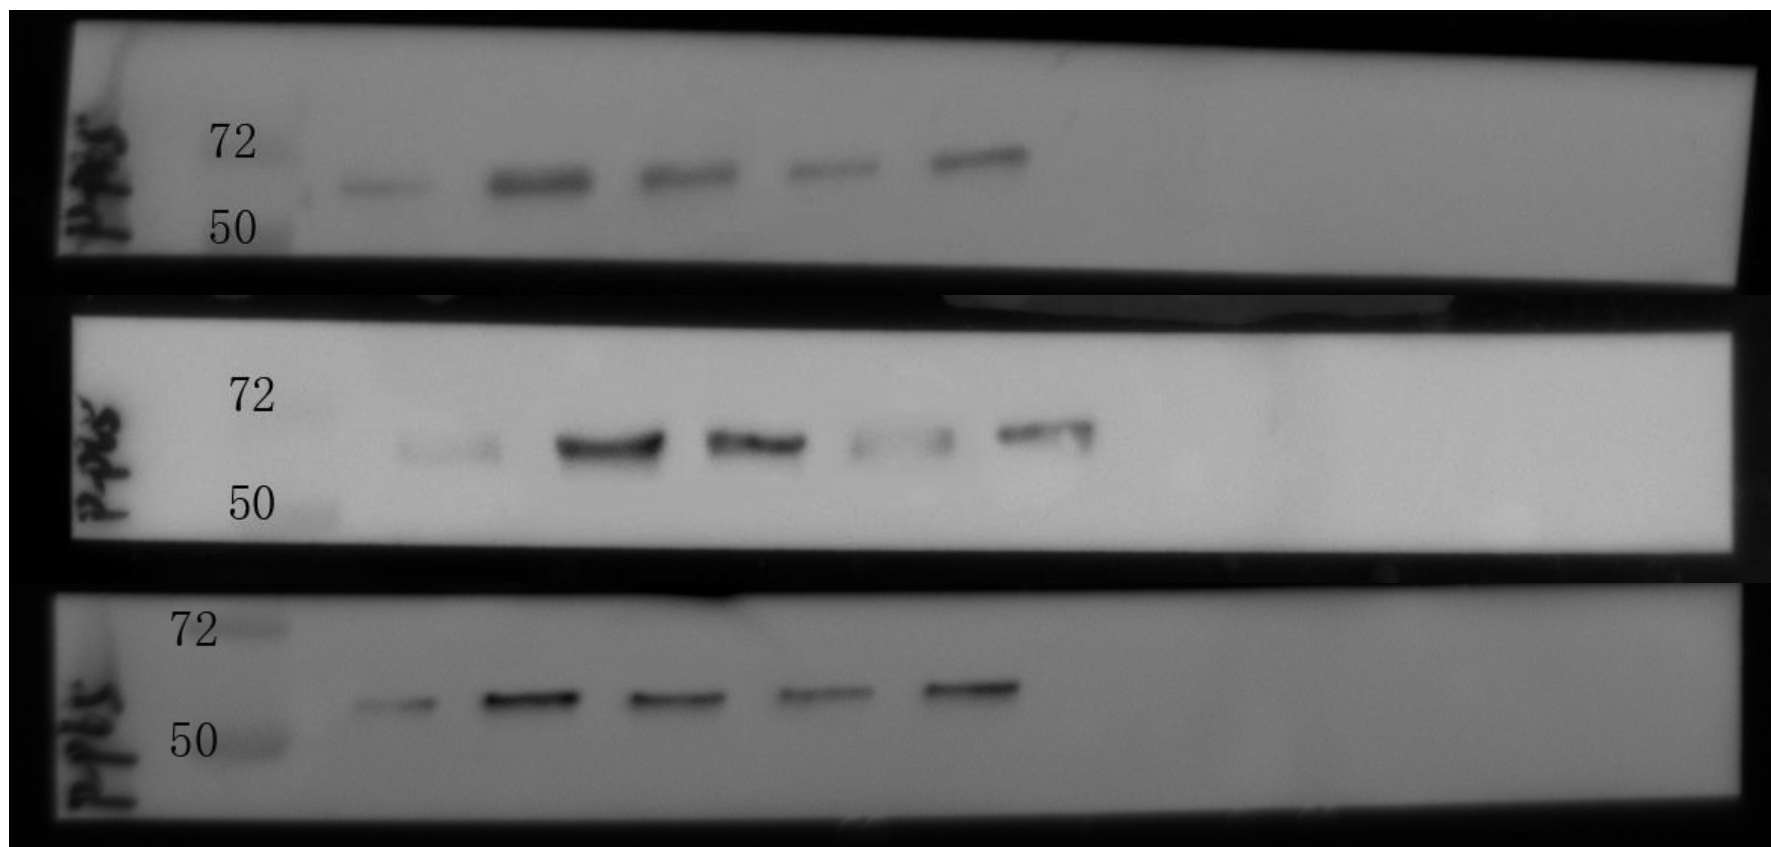

Fig.S9 p-P65 protein bands.

Table S9 Gray scale value of p-P65 protein

| bands, Group | CK   | CK   | CK   | MOD   | MOD   | MOD   | L1-HS | L1-HS | L1-HS | L2-HS | L2-HS | L2-HS | L4-HS | L4-HS | L4-HS |
|--------------|------|------|------|-------|-------|-------|-------|-------|-------|-------|-------|-------|-------|-------|-------|
| p-P65        | 5.56 | 5.61 | 6.30 | 37.97 | 37.26 | 38.64 | 27.58 | 26.30 | 25.57 | 6.14  | 8.87  | 6.11  | 14.24 | 20.73 | 18.74 |

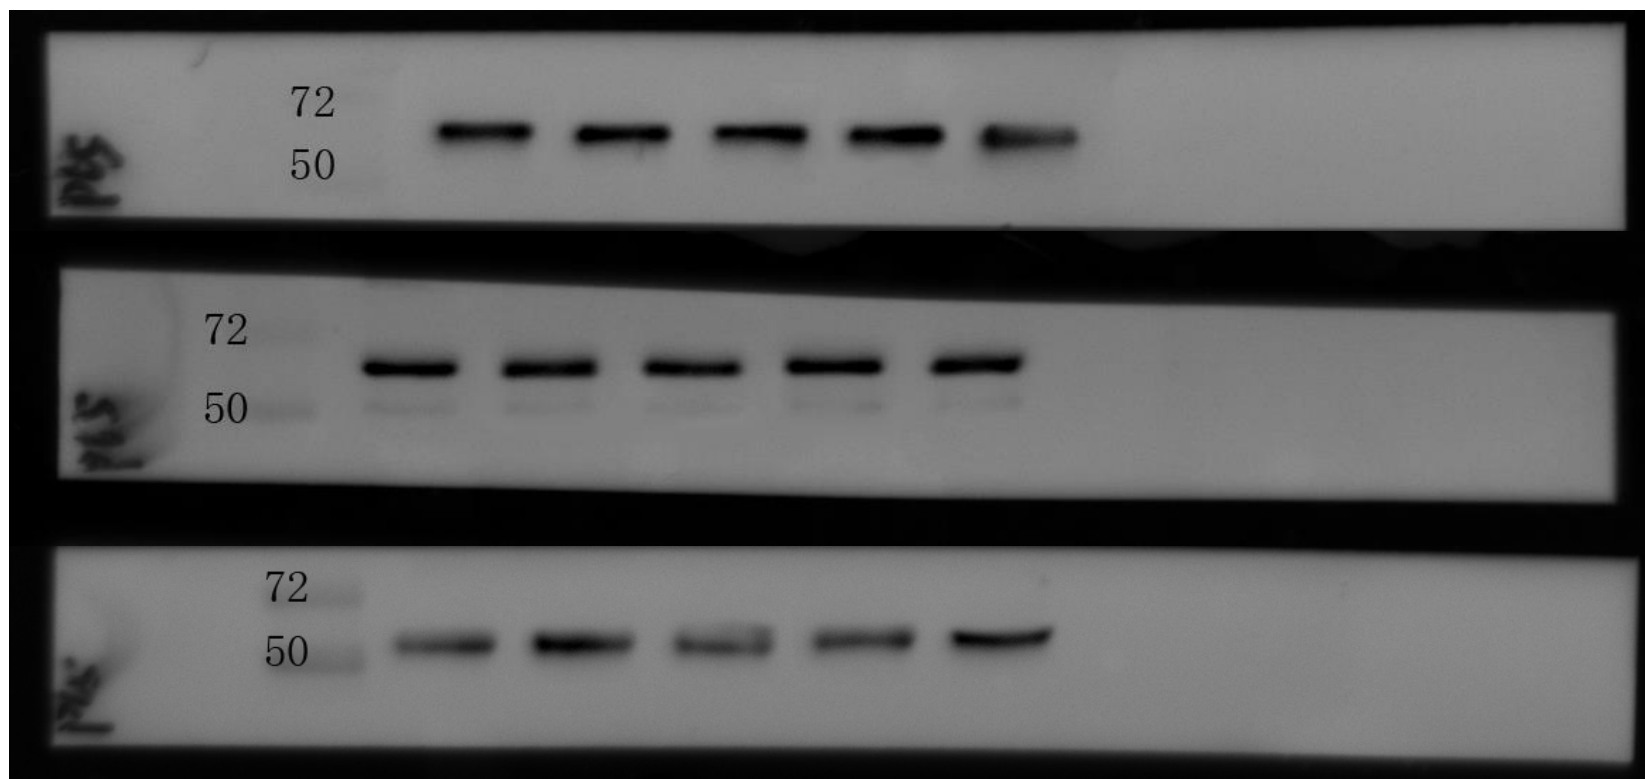

Fig.S10 P65 protein bands.

Table S10 Gray scale value of P65 protein

| bands Group | CK    | CK    | CK    | MOD   | MOD   | MOD   | L1-HS | L1-HS | L1-HS | L2-HS | L2-HS | L2-HS | L4-HS | L4-HS | L4-HS |
|-------------|-------|-------|-------|-------|-------|-------|-------|-------|-------|-------|-------|-------|-------|-------|-------|
| P65         | 51.96 | 46.85 | 52.48 | 52.84 | 59.89 | 56.92 | 48.28 | 42.63 | 54.05 | 54.84 | 50.49 | 58.19 | 52.03 | 55.25 | 52.78 |
| p-P65/P65   | 0.11  | 0.12  | 0.12  | 0.72  | 0.62  | 0.68  | 0.57  | 0.62  | 0.47  | 0.11  | 0.18  | 0.11  | 0.27  | 0.38  | 0.36  |

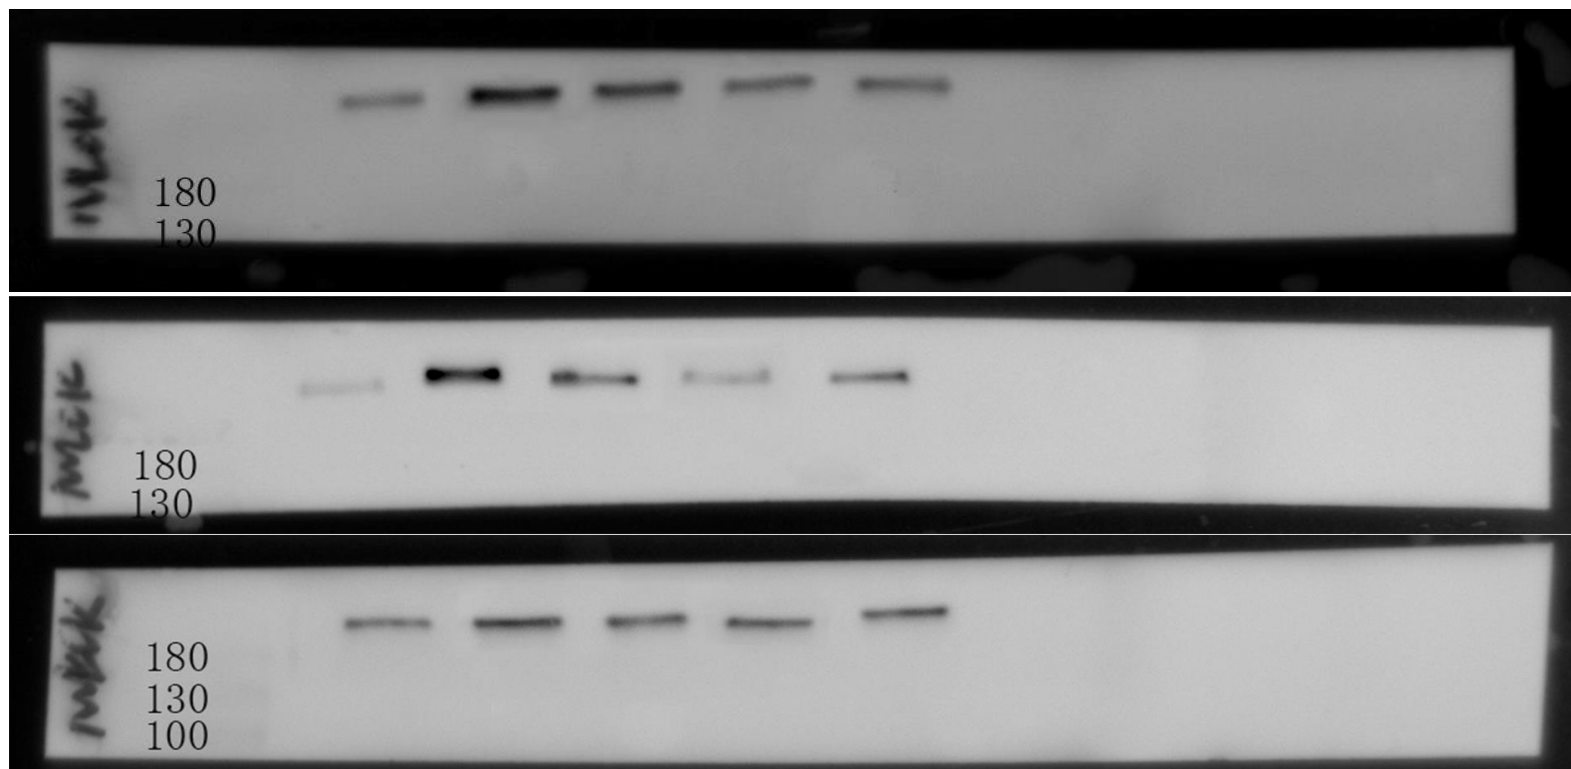

Fig.S11 MLCK protein bands.

Table S11 Gray scale value of MLCK protein

| bands Group          | CK   | CK    | CK   | MOD   | MOD   | MOD   | L1-HS | L1-HS | L1-HS | L2-HS | L2-HS | L2-HS | L4-HS | L4-HS | L4-HS |
|----------------------|------|-------|------|-------|-------|-------|-------|-------|-------|-------|-------|-------|-------|-------|-------|
| MLCK                 | 6.04 | 10.68 | 9.46 | 40.97 | 36.17 | 34.28 | 18.14 | 28.99 | 21.96 | 6.87  | 11.88 | 11.33 | 13.94 | 22.38 | 16.01 |
| MLCK/ $\beta$ -actin | 0.05 | 0.09  | 0.08 | 0.33  | 0.30  | 0.39  | 0.20  | 0.23  | 0.22  | 0.05  | 0.10  | 0.11  | 0.14  | 0.19  | 0.18  |

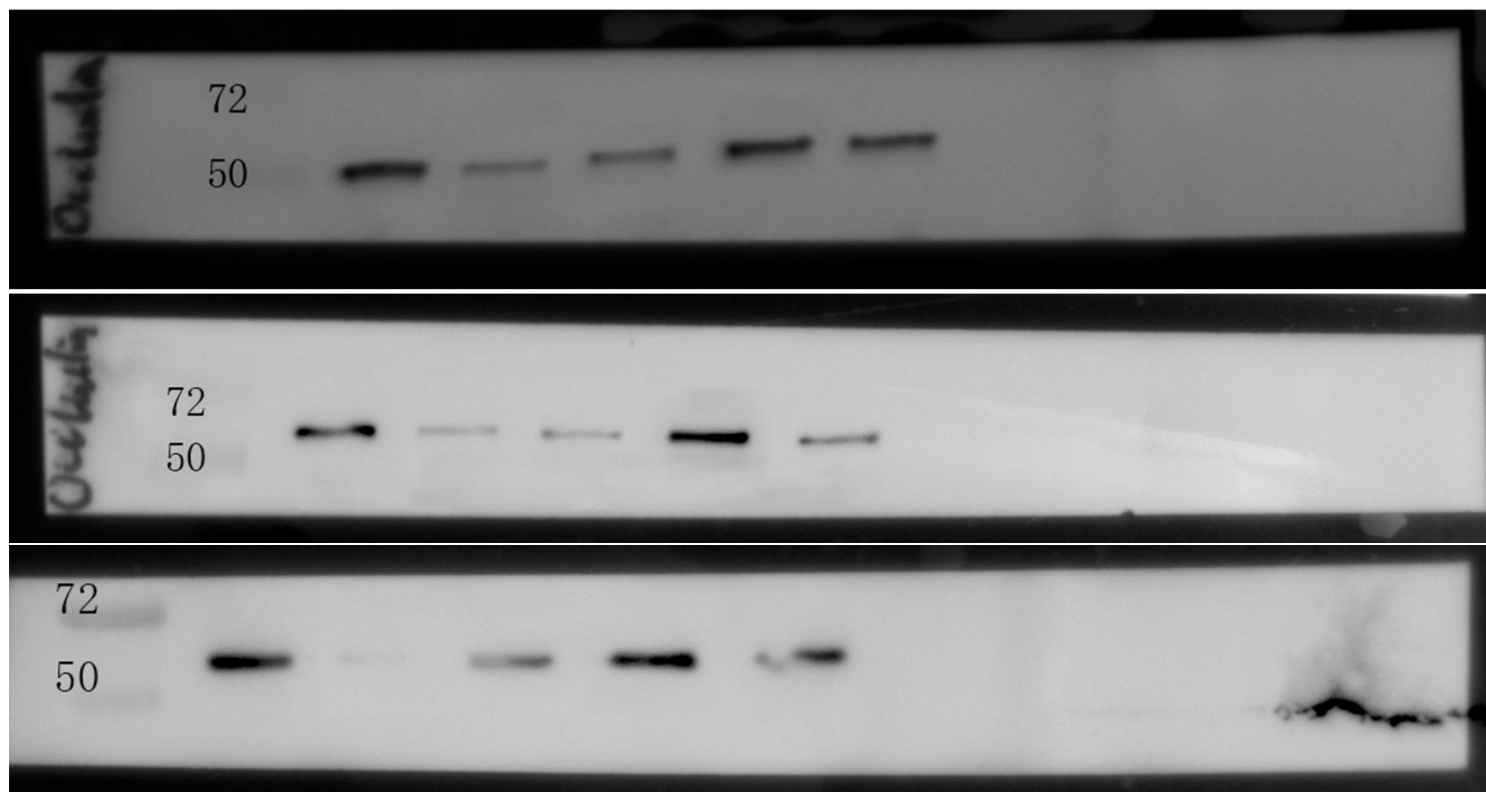

Fig.S12 Occludin protein bands.

Table S12 Gray scale value of Occludin protein

| bands Group              | CK    | CK    | CK    | MOD  | MOD  | MOD  | L1-HS | L1-HS | L1-HS | L2-HS | L2-HS | L2-HS | L4-HS | L4-HS | L4-HS |
|--------------------------|-------|-------|-------|------|------|------|-------|-------|-------|-------|-------|-------|-------|-------|-------|
| Occludin                 | 37.09 | 39.97 | 35.65 | 5.20 | 4.63 | 8.10 | 9.58  | 15.15 | 15.02 | 44.25 | 36.83 | 37.10 | 17.60 | 23.92 | 27.26 |
| Occludin/ $\beta$ -actin | 0.30  | 0.34  | 0.32  | 0.04 | 0.04 | 0.09 | 0.11  | 0.12  | 0.15  | 0.33  | 0.31  | 0.36  | 0.18  | 0.20  | 0.30  |

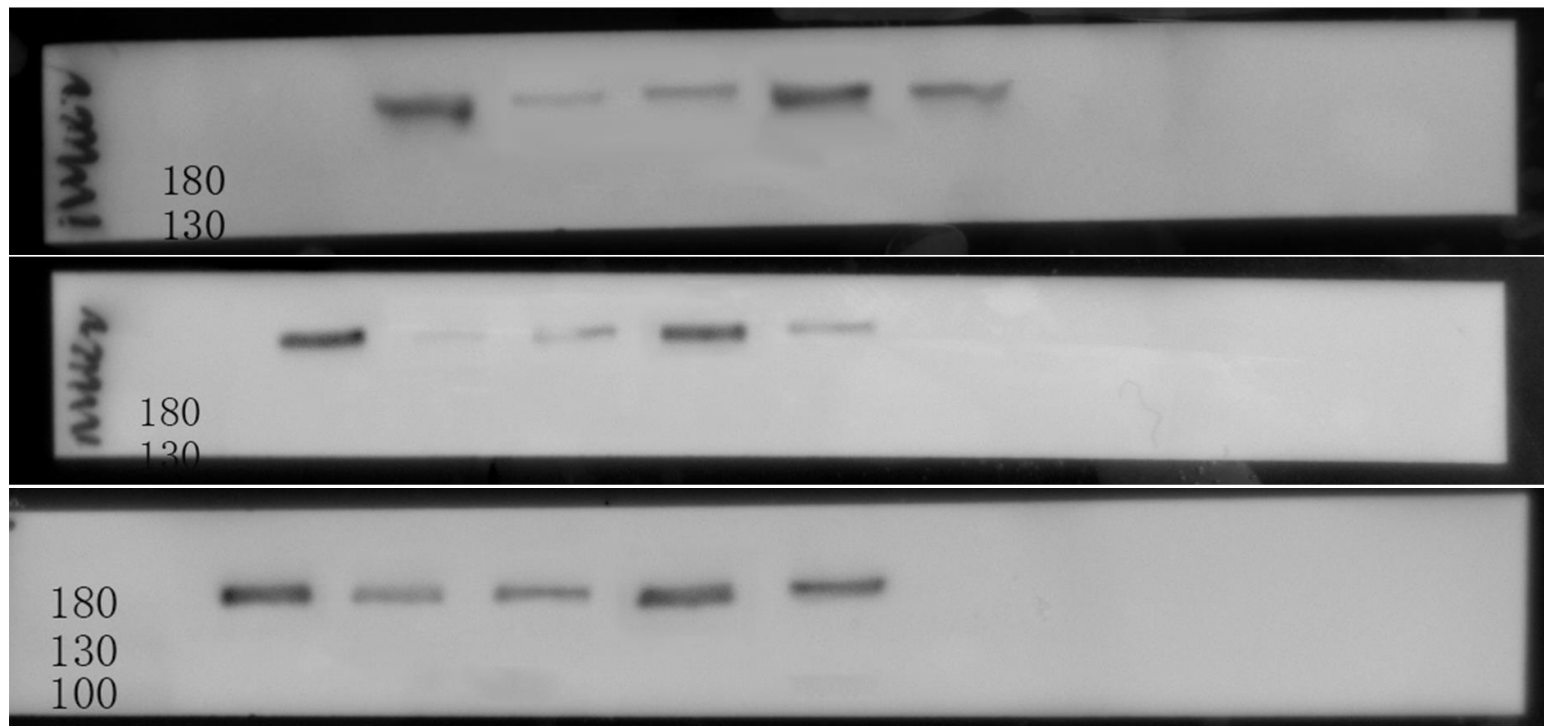

Fig.S13 Muc2 protein bands.

Table S13 Gray scale value of Muc2 protein

| bands Group          | CK    | CK    | CK    | MOD  | MOD  | MOD  | L1-HS | L1-HS | L1-HS | L2-HS | L2-HS | L2-HS | L4-HS | L4-HS | L4-HS |
|----------------------|-------|-------|-------|------|------|------|-------|-------|-------|-------|-------|-------|-------|-------|-------|
| Muc2                 | 25.92 | 30.85 | 31.45 | 4.42 | 5.20 | 9.56 | 9.45  | 8.80  | 14.65 | 26.54 | 32.56 | 30.22 | 12.94 | 12.23 | 20.66 |
| Muc2/ $\beta$ -actin | 0.23  | 0.25  | 0.27  | 0.05 | 0.04 | 0.08 | 0.10  | 0.10  | 0.12  | 0.26  | 0.24  | 0.25  | 0.14  | 0.13  | 0.17  |

Table S14 Effect of LTA interventions on the increase in body mass and food intake of mice during HS

| Group                           | CK        | MOD          | L1-HS      | L2-HS                    | L4-HS                   |
|---------------------------------|-----------|--------------|------------|--------------------------|-------------------------|
| 50-44d $\Delta$ -Body mass(g)   | 0.26±0.14 | -0.76±0.39** | -0.57±0.50 | -0.38±0.30 <sup>##</sup> | -0.42±0.37 <sup>#</sup> |
| 50-44d $\Delta$ -Food intake(g) | 0.09±0.05 | -0.74±0.24** | -0.69±0.23 | -0.43±0.39 <sup>#</sup>  | -0.66±0.51 <sup>#</sup> |

Table S15 Differences in villus height and crypt depth among treatment groups

| Group                   | CK     | MOD    | L1-HS  | L2-HS  | L4-HS  |
|-------------------------|--------|--------|--------|--------|--------|
| villus height( $\mu$ m) | 156.51 | 88.87  | 115.47 | 153.99 | 145.04 |
| villus height( $\mu$ m) | 185.86 | 108.89 | 142.32 | 136.69 | 120.12 |
| villus height( $\mu$ m) | 152.85 | 79     | 121.53 | 163.21 | 130.4  |
| crypt depth( $\mu$ m)   | 50.05  | 70.31  | 42.8   | 55.63  | 52.62  |
| crypt depth( $\mu$ m)   | 60.71  | 88.08  | 55.36  | 57.38  | 50.23  |
| crypt depth( $\mu$ m)   | 41.94  | 56.67  | 62.28  | 68.96  | 65.77  |
| V/C                     | 3.13   | 1.26   | 2.7    | 2.77   | 2.76   |
| V/C                     | 3.06   | 1.24   | 2.57   | 2.38   | 2.39   |
| V/C                     | 3.64   | 1.39   | 1.95   | 2.37   | 1.98   |

Table S16 Levels of DAO, D-LA and FITC-dextran in HS mouse serum

| Group | CK       | MOD      | L1-HS  | L2-HS  | L4-HS |
|-------|----------|----------|--------|--------|-------|
| DAO   | 90.26448 | 111.143  | 103.8  | 102.16 | 98.1  |
| DAO   | 89.92181 | 108.5729 | 104.02 | 103.78 | 98.64 |

|                                  |          |          |          |         |         |
|----------------------------------|----------|----------|----------|---------|---------|
| DAO                              | 92.2226  | 112.1465 | 100.91   | 99.57   | 96.7    |
| DAO                              | 98.83127 | 110.2373 | 102.28   | 96.48   | 98.81   |
| DAO                              | 98.78232 | 110.2863 | 103.95   | 98.42   | 101.16  |
| D-LA( $\mu\text{g/L}$ )          | 616.3706 | 715.5834 | 692.1667 | 546.27  | 565.53  |
| D-LA( $\mu\text{g/L}$ )          | 624.5356 | 717.4321 | 695.4019 | 555.21  | 569.85  |
| D-LA( $\mu\text{g/L}$ )          | 611.7489 | 701.2561 | 674.4501 | 559.37  | 583.25  |
| D-LA( $\mu\text{g/L}$ )          | 651.9578 | 649.4929 | 638.863  | 617.76  | 613.44  |
| D-LA( $\mu\text{g/L}$ )          | 655.193  | 670.2906 | 661.0472 | 597.27  | 604.2   |
| FITC-dextran( $\mu\text{g/mL}$ ) | 0.54114  | 1.01102  | 0.73253  | 0.77237 | 0.46281 |
| FITC-dextran( $\mu\text{g/mL}$ ) | 0.6158   | 1.1911   | 0.8185   | 0.7827  | 0.6847  |
| FITC-dextran( $\mu\text{g/mL}$ ) | 0.69406  | 1.37118  | 0.90447  | 0.79303 | 0.90659 |

Table S17 Differences in goblet cells count among groups

| Group              | CK   | MOD | L1-HS | L2-HS | L4-HS |
|--------------------|------|-----|-------|-------|-------|
| Goblet cells count | 1459 | 638 | 848   | 1279  | 1006  |
| Goblet cells count | 1887 | 594 | 895   | 1340  | 1265  |
| Goblet cells count | 1432 | 804 | 895   | 1307  | 968   |

Table S18 Levels of TNF- $\alpha$ , IFN- $\gamma$ , sIgA, IL-4 and IL-10 in HS mouse colon

| Group                | CK       | MOD      | L1-HS    | L2-HS    | L4-HS    |
|----------------------|----------|----------|----------|----------|----------|
| TNF- $\alpha$ (pg/g) | 3045.666 | 4158.711 | 4348.354 | 2864.885 | 4024.011 |
| TNF- $\alpha$ (pg/g) | 2983.634 | 4380.257 | 4031.101 | 2964.137 | 3710.303 |

|                      |          |          |          |          |          |
|----------------------|----------|----------|----------|----------|----------|
| TNF- $\alpha$ (pg/g) | 3237.082 | 4662.063 | 4475.964 | 2739.047 | 3931.848 |
| TNF- $\alpha$ (pg/g) | 3019.081 | 4644.339 | 3738.661 | 3366.464 | 4417.477 |
| TNF- $\alpha$ (pg/g) | 2838.3   | 5902.718 | 3944.255 | 3462.172 | 3951.344 |
| TNF- $\alpha$ (pg/g) | 3244.171 | 5470.261 | 3795.376 | 3137.829 | 3740.433 |
| TNF- $\alpha$ (pg/g) | 2999.585 | 5746.75  | 4612.437 | 4082.5   | 3914.125 |
| TNF- $\alpha$ (pg/g) | 3245.943 | 4522.046 | 4371.395 | 4153.394 | 3366.464 |
| TNF- $\alpha$ (pg/g) | 3245.943 | 4522.046 | 4257.963 | 3933.621 | 3577.376 |
| IFN- $\gamma$ (pg/g) | 3646.884 | 6702.049 | 5906.236 | 3732.975 | 4816.456 |
| IFN- $\gamma$ (pg/g) | 3348.717 | 7014.915 | 5645.865 | 4012.244 | 4961.34  |
| IFN- $\gamma$ (pg/g) | 3466.304 | 6607.559 | 5881.039 | 4035.342 | 4476.293 |
| IFN- $\gamma$ (pg/g) | 2279.934 | 4885.748 | 4314.611 | 3203.833 | 5318.301 |
| IFN- $\gamma$ (pg/g) | 2576.002 | 5183.916 | 4173.926 | 3487.302 | 5232.21  |
| IFN- $\gamma$ (pg/g) | 2542.406 | 4961.34  | 4035.342 | 3113.543 | 5511.479 |
| IFN- $\gamma$ (pg/g) | 2680.99  | 6271.596 | 5503.081 | 4566.583 | 4675.771 |
| IFN- $\gamma$ (pg/g) | 3035.851 | 6175.007 | 5547.176 | 4864.75  | 4791.259 |
| IFN- $\gamma$ (pg/g) | 2905.666 | 5937.733 | 5862.141 | 4218.021 | 4791.259 |
| sIgA( $\mu$ g/g)     | 304.0728 | 97.25605 | 138.6773 | 248.941  | 183.3814 |
| sIgA( $\mu$ g/g)     | 284.1829 | 91.1732  | 138.3877 | 261.7826 | 172.9537 |
| sIgA( $\mu$ g/g)     | 304.459  | 89.72491 | 148.2361 | 232.4304 | 187.5332 |
| sIgA( $\mu$ g/g)     | 290.1692 | 158.5673 | 194.6781 | 215.0508 | 195.354  |
| sIgA( $\mu$ g/g)     | 226.8303 | 167.0639 | 184.9263 | 227.4096 | 203.6576 |
| sIgA( $\mu$ g/g)     | 241.9892 | 161.7535 | 190.4298 | 225.0924 | 200.4713 |



|                  |          |          |          |          |          |
|------------------|----------|----------|----------|----------|----------|
| sIgA( $\mu$ g/g) | 238.4167 | 123.2288 | 203.8507 | 196.7057 | 219.4923 |
| sIgA( $\mu$ g/g) | 218.4302 | 129.1186 | 199.4092 | 222.6785 | 235.2304 |
| sIgA( $\mu$ g/g) | 230.4993 | 126.5116 | 209.2577 | 247.203  | 218.4302 |
| IL-4 (pg/g)      | 1189.696 | 457.8452 | 799.8851 | 1088.422 | 1019.154 |
| IL-4 (pg/g)      | 1087.466 | 434.9151 | 749.2479 | 1131.415 | 1044.95  |
| IL-4 (pg/g)      | 1236.989 | 413.8959 | 853.8662 | 1014.854 | 955.6183 |
| IL-4 (pg/g)      | 1237.467 | 674.2475 | 797.9742 | 960.3954 | 886.8282 |
| IL-4 (pg/g)      | 1179.186 | 700.0438 | 781.7321 | 919.7901 | 806.0953 |
| IL-4 (pg/g)      | 1135.715 | 723.9293 | 722.4962 | 935.5545 | 896.86   |
| IL-4 (pg/g)      | 1305.779 | 531.8901 | 685.2348 | 1098.453 | 840.4904 |
| IL-4 (pg/g)      | 1238.9   | 521.8582 | 579.1833 | 1071.702 | 809.9169 |
| IL-4 (pg/g)      | 1342.085 | 530.457  | 717.2413 | 1162.466 | 897.8155 |
| IL-10(pg/g)      | 2979.596 | 1364.018 | 2513.61  | 2487.59  | 2986.693 |
| IL-10(pg/g)      | 3117.973 | 1290.69  | 2346.848 | 2446.195 | 2748.969 |
| IL-10(pg/g)      | 3010.347 | 1437.346 | 2432.003 | 2453.292 | 2989.058 |
| IL-10(pg/g)      | 2468.667 | 1324.989 | 2255.779 | 2728.862 | 2482.859 |
| IL-10(pg/g)      | 2372.867 | 1256.392 | 2106.758 | 2648.438 | 2388.243 |
| IL-10(pg/g)      | 2441.465 | 1248.113 | 2178.903 | 2663.813 | 2662.631 |
| IL-10(pg/g)      | 3447.948 | 1531.962 | 2434.368 | 2870.787 | 2692.198 |
| IL-10(pg/g)      | 3553.209 | 1459.817 | 2370.502 | 2754.882 | 2715.853 |
| IL-10(pg/g)      | 3458.593 | 1443.259 | 2429.637 | 2681.554 | 2758.43  |

---

Table S19 Differences in Shannon, ACE, and microbiota among groups

| Gruop                  | CK         | MOD        | L1-HS      | L2-HS      | L4-HS      |
|------------------------|------------|------------|------------|------------|------------|
| ACE                    | 392.64     | 370.72     | 462.86     | 494.45     | 376.11     |
| ACE                    | 402.91     | 345.48     | 452.19     | 456.6      | 401.85     |
| ACE                    | 403.11     | 349.69     | 461.16     | 475.52     | 412.99     |
| Shannon                | 2.66       | 2.12       | 3.39       | 4          | 3.58       |
| Shannon                | 2.83       | 1.8        | 3.66       | 3.86       | 3.67       |
| Shannon                | 2.99       | 1.47       | 3.13       | 4.03       | 2.73       |
| <i>Enterorhabdus</i>   | 2.46167±0. | 8.42667±1. | 0.89±0.499 | 1.11333±0. | 6.833±0.89 |
| abundance(%)           | 401328     | 869474     | 3          | 675747     | 24         |
| <i>Turicibacter</i>    | 3.4463±1.3 | 0.2587±0.0 | 2.1193±1.3 | 5.6887±3.5 | 7.6047±3.6 |
| abundance(%)           | 1585       | 2542       | 7397       | 2650       | 2542       |
| <i>Bifidobacterium</i> | 12.8253±5. | 0.5927±0.0 | 4.6917±1.0 | 4.5373±1.8 | 5.5757±1.0 |
| abundance(%)           | 1736       | 2706       | 885        | 4558       | 0418       |
| <i>Desulfovibrio</i>   | 2.208±0.86 | 4.9033±2.1 | 1.43500±0. | 0.61533±0. | 3.4933±1.0 |
| abundance(%)           | 1786       | 95822      | 80047      | 139919     | 44674      |

Table S20 Effect of LTA on the expression of Hsps and intestinal barrier-associated mRNAs in colon tissues of heat-stressed mice

| Gruop       | CK   | MOD  | L1-HS | L2-HS | L4-HS |
|-------------|------|------|-------|-------|-------|
| <i>Hsfl</i> | 1.00 | 1.38 | 0.82  | 0.68  | 0.67  |
| <i>Hsfl</i> | 1.00 | 1.29 | 0.78  | 0.50  | 0.44  |

|              |      |       |      |      |       |
|--------------|------|-------|------|------|-------|
| <i>Hsf1</i>  | 1.00 | 1.35  | 0.57 | 0.20 | 0.47  |
| <i>Hsp70</i> | 1.00 | 1.04  | 0.97 | 0.74 | 0.49  |
| <i>Hsp70</i> | 1.00 | 2.45  | 0.85 | 0.36 | 0.45  |
| <i>Hsp70</i> | 1.00 | 1.50  | 0.96 | 0.25 | 0.33  |
| <i>Hsph1</i> | 1.00 | 9.07  | 2.31 | 2.01 | 12.14 |
| <i>Hsph1</i> | 1.00 | 16.26 | 2.48 | 1.69 | 10.52 |
| <i>Hsph1</i> | 1.00 | 13.40 | 2.56 | 1.87 | 7.44  |
| <i>TLR4</i>  | 1.00 | 1.45  | 1.27 | 1.01 | 1.05  |
| <i>TLR4</i>  | 1.00 | 1.52  | 1.06 | 0.93 | 0.81  |
| <i>TLR4</i>  | 1.00 | 1.58  | 1.29 | 0.92 | 1.30  |
| <i>MAPK</i>  | 1.00 | 1.15  | 0.43 | 0.83 | 2.15  |
| <i>MAPK</i>  | 1.00 | 2.62  | 0.77 | 1.04 | 1.51  |
| <i>MAPK</i>  | 1.00 | 2.55  | 0.52 | 0.74 | 1.60  |
| <i>NF-κB</i> | 1.00 | 1.88  | 1.30 | 0.93 | 1.27  |
| <i>NF-κB</i> | 1.00 | 1.98  | 1.38 | 0.94 | 1.35  |
| <i>NF-κB</i> | 1.00 | 1.47  | 1.59 | 0.88 | 1.02  |
| <i>GPR41</i> | 1.00 | 1.01  | 2.03 | 5.69 | 3.77  |
| <i>GPR41</i> | 1.00 | 0.48  | 3.70 | 4.01 | 2.92  |
| <i>GPR41</i> | 1.00 | 0.74  | 2.59 | 6.36 | 4.33  |
| <i>GPR43</i> | 1.00 | 0.34  | 3.31 | 4.07 | 4.83  |
| <i>GPR43</i> | 1.00 | 0.78  | 2.04 | 4.94 | 5.21  |
| <i>GPR43</i> | 1.00 | 0.93  | 3.03 | 5.01 | 5.60  |

|                  |      |       |      |      |      |
|------------------|------|-------|------|------|------|
| <i>GPR109A</i>   | 1.00 | 0.71  | 1.35 | 4.51 | 2.76 |
| <i>GPR109A</i>   | 1.00 | 0.49  | 1.41 | 5.04 | 2.21 |
| <i>GPR109A</i>   | 1.00 | 0.52  | 0.67 | 4.77 | 3.69 |
| <i>MLCK</i>      | 1.00 | 5.70  | 5.00 | 3.55 | 5.67 |
| <i>MLCK</i>      | 1.00 | 7.14  | 3.68 | 4.01 | 4.46 |
| <i>MLCK</i>      | 1.00 | 10.37 | 1.99 | 0.88 | 2.82 |
| <i>Claudin-1</i> | 1.00 | 0.64  | 0.56 | 0.84 | 0.83 |
| <i>Claudin-1</i> | 1.00 | 0.26  | 0.72 | 0.95 | 0.74 |
| <i>Claudin-1</i> | 1.00 | 0.13  | 0.78 | 0.98 | 0.84 |
| <i>Occludin</i>  | 1.00 | 0.29  | 0.26 | 0.47 | 0.42 |
| <i>Occludin</i>  | 1.00 | 0.20  | 0.35 | 0.58 | 0.35 |
| <i>Occludin</i>  | 1.00 | 0.13  | 0.36 | 0.68 | 0.44 |
| <i>ZO-1</i>      | 1.00 | 0.28  | 0.47 | 0.55 | 0.47 |
| <i>ZO-1</i>      | 1.00 | 0.23  | 0.41 | 0.51 | 0.76 |
| <i>ZO-1</i>      | 1.00 | 0.12  | 0.28 | 0.72 | 0.45 |
| <i>Muc2</i>      | 1.00 | 0.30  | 0.44 | 0.93 | 0.63 |
| <i>Muc2</i>      | 1.00 | 0.48  | 0.40 | 0.76 | 0.73 |
| <i>Muc2</i>      | 1.00 | 0.34  | 0.35 | 0.65 | 0.87 |
| <i>Muc4</i>      | 1.00 | 0.46  | 0.38 | 0.51 | 0.65 |
| <i>Muc4</i>      | 1.00 | 0.36  | 0.47 | 0.66 | 0.46 |
| <i>Muc4</i>      | 1.00 | 0.25  | 0.51 | 0.80 | 0.65 |

---
